# Supplementary material for: Metal porphyrins (M = Ti, Fe, Co, Ni, Cu, or Zn) as potential catalysts for the oxidation of CO by N2O: insight from DFT calculations
Source: Royal Society of Chemistry journal article supplement (doi:10.1039/d2nj04440d), 2022-11-16
Supplement: d2nj04440d1.pdf [file d2nj04440d1.pdf]

Electronic Supplementary Material (ESI) for New Journal of Chemistry.

This journal is © The Royal Society of Chemistry and the Centre National de la Recherche Scientifique 2019

## Supporting Information

### **Metal–Porphyrin (M=Ti, Fe, Co, Ni, Cu, or Zn), A Potential Catalyst for the Oxidation of CO by N<sub>2</sub>O: Insight from DFT Calculations**

Shutao Wang,<sup>b†</sup> Zhao Liu,<sup>a†</sup> YanJie Ye,<sup>b</sup> Xu Meng,<sup>a</sup> Pengcheng Yang,<sup>a</sup> Zhengze Zhang<sup>b</sup>, Yifeng Qiu<sup>\*c</sup> and Junqiang Lei<sup>\*a</sup>

*a. First Hospital of Lanzhou University, Lanzhou University, 222 South Tianshui Road, Lanzhou 730000 (P. R. China). E-mail:*

*leijq2011@126.com*

*b. State Key Laboratory of Applied Organic Chemistry, College of Chemistry and Chemical Engineering, Lanzhou University, 222 South Tianshui Road, Lanzhou 730000 (P. R. China)*

*c. College of Chemistry and Chemical Engineering, Northwest Normal University, 967 East Anning Road, Lanzhou 730070 (P. R. China). E-mail: qyfnet@nwnu.edu.cn*

# Contents

|                                                                         |   |
|-------------------------------------------------------------------------|---|
| 1. Adsorption of the N <sub>2</sub> O and CO on metal-porphyrin .....   | 3 |
| 2. N <sub>2</sub> O decomposition catalyzed by metal-porphyrin .....    | 4 |
| 3. Bond length of N <sub>2</sub> O decomposition and CO oxidation ..... | 6 |
| 4. Charge of N <sub>2</sub> O decomposition and CO oxidation .....      | 6 |
| 5. Oxidation of CO by N <sub>2</sub> O on O-Ti-porphyrin .....          | 7 |
| 6. Oxidation of CO by N <sub>2</sub> O on O-Fe-porphyrin .....          | 8 |
| 7. Cartesian coordinates of all transition states .....                 | 9 |

## 1. Adsorption of the N<sub>2</sub>O and CO on metal-porphyrin

Table S1. Adsorption energy of the N<sub>2</sub>O and CO on metal-porphyrin.

|                      | Ti-Pro | Fe-Pro | Co-Pro | Ni-Pro | Cu-Pro | Zn-Pro |
|----------------------|--------|--------|--------|--------|--------|--------|
| M-CO                 | -33.6  | -7.6   | -10.5  | -3.2   | -3.2   | -4.5   |
| M-OC                 | -12.3  | -2.9   | -2.9   | -3.2   | -2.3   | -2.5   |
| M-ON <sub>2</sub>    | -8.8   | -2.0   | -1.9   | -1.5   | -0.6   | -0.3   |
| M-CO-ON <sub>2</sub> | -36.5  | -11.3  | /      | /      | /      | /      |
| M-OC-ON <sub>2</sub> | -2.7   | 7.3    | /      | /      | /      | /      |

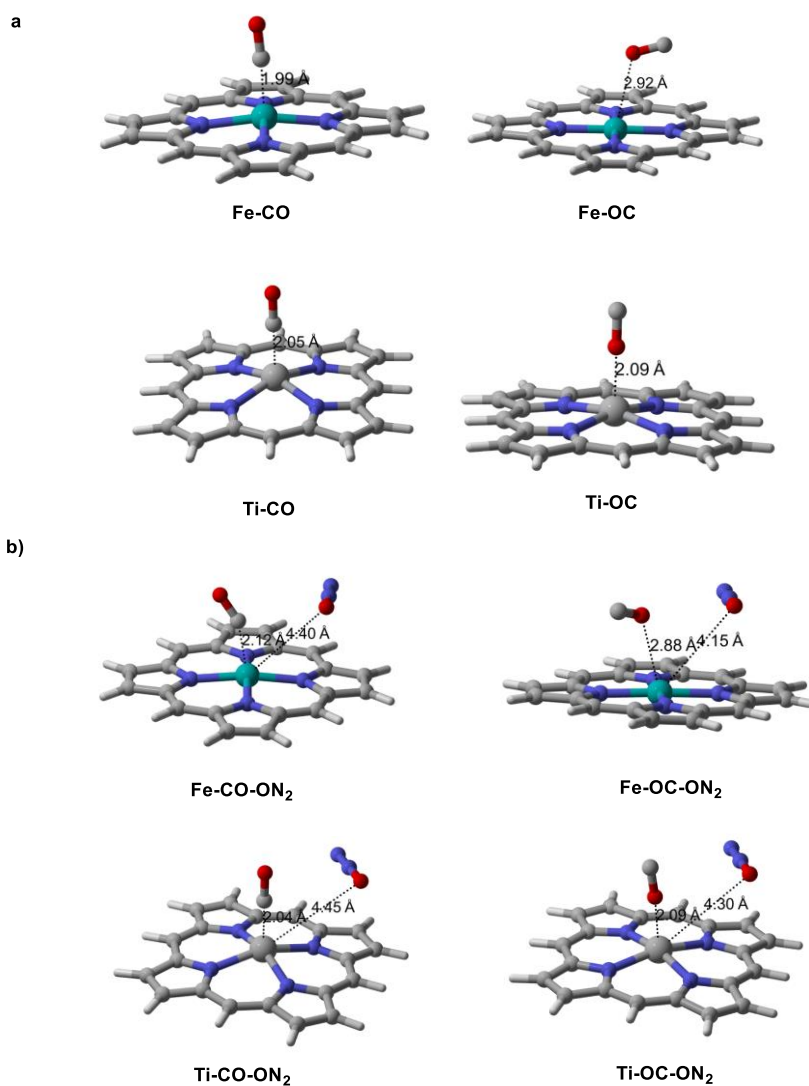

Figure S1. Optimized structures of the adsorption complexes of the reactant molecules: a) CO on Ti or Fe-porphyrin; b) coadsorption of CO and N<sub>2</sub>O on Ti or Fe-porphyrin.

## 2. N<sub>2</sub>O decomposition catalyzed by metal-porphyrin

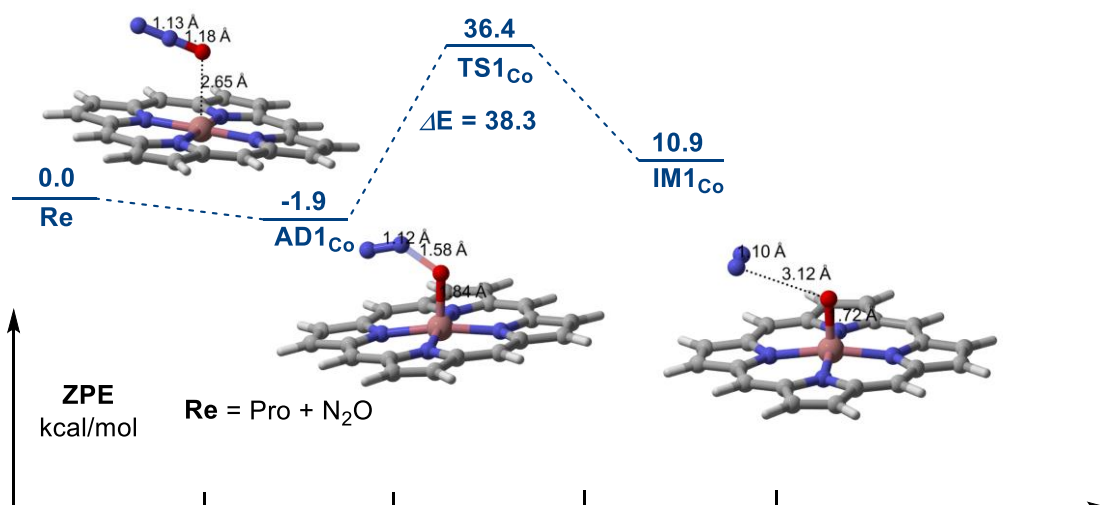

Figure S2. N<sub>2</sub>O decomposition catalyzed by Co-porphyrin

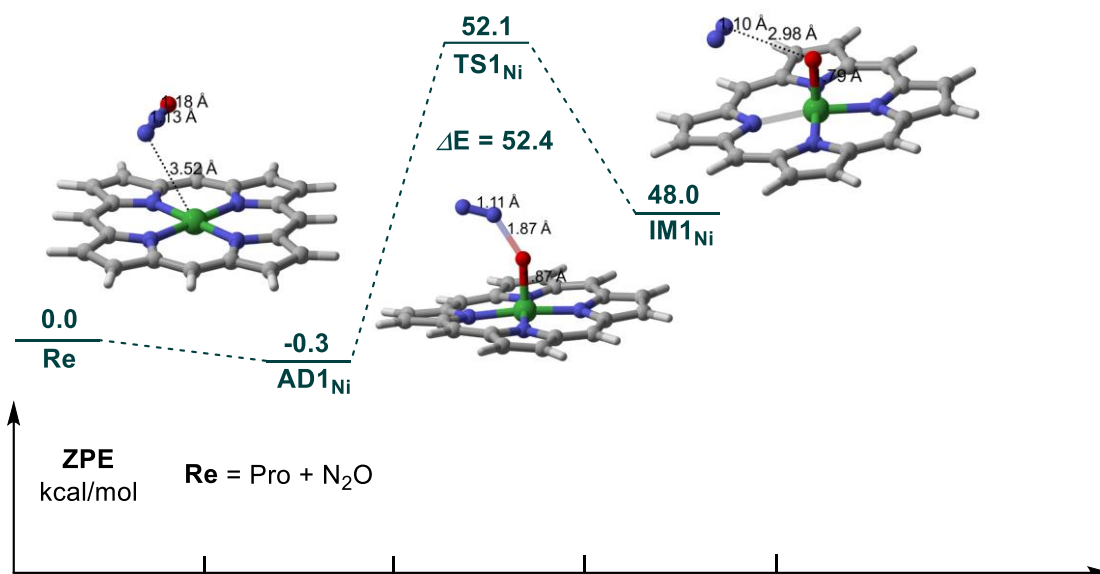

Figure S3. N<sub>2</sub>O decomposition catalyzed by Ni-porphyrin

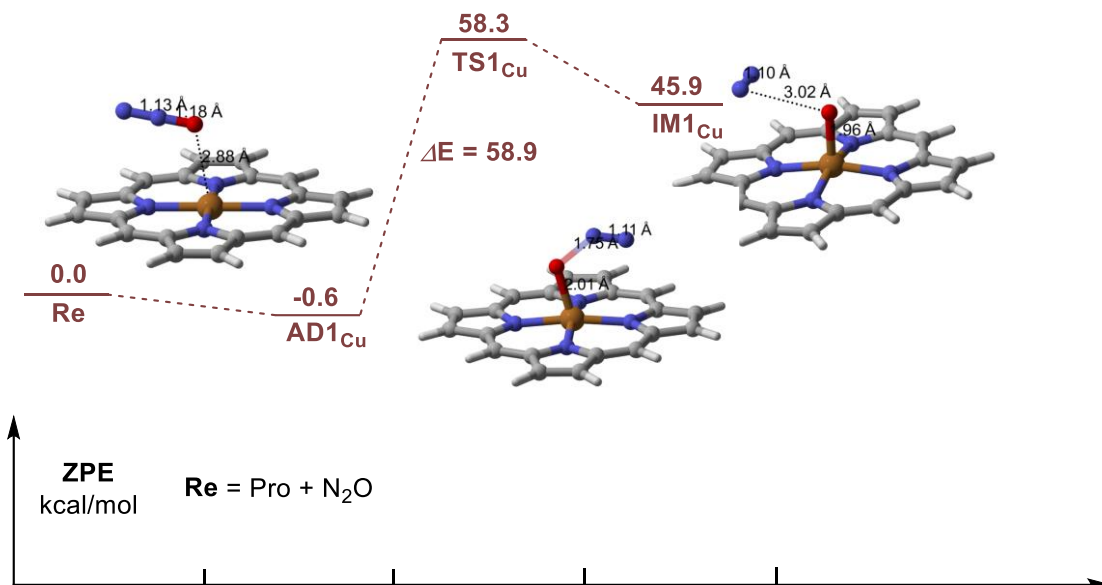

Figure S4.  $\text{N}_2\text{O}$  decomposition catalyzed by Cu-porphyrin

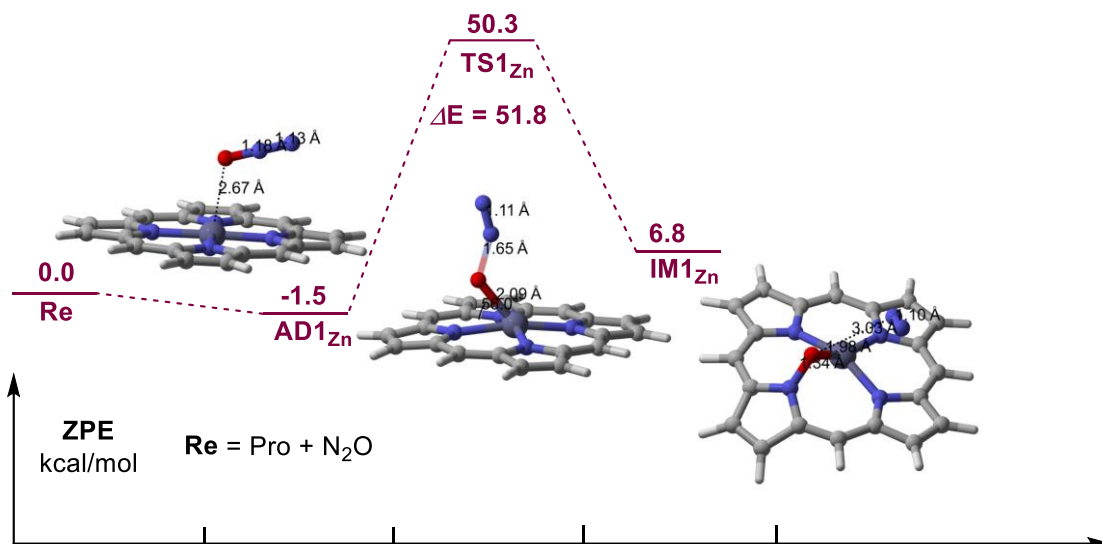

Figure S5.  $\text{N}_2\text{O}$  decomposition catalyzed by Zn-porphyrin

### 3. Bond length of N<sub>2</sub>O decomposition and CO oxidation

Table S2. Bond length of TS for N<sub>2</sub>O decomposition on metal-porphyrins.

|              | M-O / Å | O-N / Å | N-N / Å |
|--------------|---------|---------|---------|
| Ti-porphyrin | 2.02    | 1.25    | 1.14    |
| Fe-porphyrin | 1.86    | 1.48    | 1.13    |
| Co-porphyrin | 1.84    | 1.58    | 1.12    |
| Ni-porphyrin | 1.87    | 1.87    | 1.11    |
| Cu-porphyrin | 2.01    | 1.75    | 1.11    |
| Zn-porphyrin | 2.09    | 1.65    | 1.11    |

Table S3. Bond length of TS for CO oxidation by O-M-porphyrins.

|                | M-O / Å | O-C / Å | C-O / Å |
|----------------|---------|---------|---------|
| O-Ti-porphyrin | 1.62    | 1.77    | 1.15    |
| O-Fe-porphyrin | 1.62    | 1.75    | 1.15    |

### 4. Charge of N<sub>2</sub>O decomposition and CO oxidation

Table S4. Charge of N<sub>2</sub>O decomposition.

|                            | M    | O     | N1   | N2    |
|----------------------------|------|-------|------|-------|
| Ti-porphyrin <sub>R</sub>  | 1.22 | -0.45 | 0.58 | -0.02 |
| Ti-porphyrin <sub>TS</sub> | 1.29 | -0.42 | 0.43 | -0.20 |
| Fe-porphyrin <sub>R</sub>  | 0.45 | -0.46 | 0.58 | -0.09 |
| Fe-porphyrin <sub>TS</sub> | 0.40 | -0.34 | 0.18 | -0.18 |
| Co-porphyrin <sub>R</sub>  | 0.35 | -0.45 | 0.57 | -0.09 |
| Co-porphyrin <sub>TS</sub> | 0.30 | -0.30 | 0.15 | -0.12 |
| Ni-porphyrin <sub>R</sub>  | 0.25 | -0.45 | 0.57 | -0.12 |
| Ni-porphyrin <sub>TS</sub> | 0.26 | -0.44 | 0.10 | -0.11 |
| Cu-porphyrin <sub>R</sub>  | 0.11 | -0.45 | 0.57 | -0.11 |

|                            |      |       |      |       |
|----------------------------|------|-------|------|-------|
| Cu-porphyrin <sub>TS</sub> | 0.13 | -0.34 | 0.13 | -0.08 |
| Zn-porphyrin <sub>R</sub>  | 0.47 | -0.45 | 0.59 | -0.10 |
| Zn-porphyrin <sub>TS</sub> | 0.52 | -0.34 | 0.19 | -0.09 |

Table S5. Charge of CO oxidation.

|                              | M    | O1    | C    | O2    |
|------------------------------|------|-------|------|-------|
| O-Ti-porphyrin <sub>R</sub>  | 1.29 | -0.56 | 0.12 | -0.15 |
| O-Ti-porphyrin <sub>TS</sub> | 1.21 | -0.50 | 0.23 | -0.25 |
| O-Fe-porphyrin <sub>R</sub>  | 0.45 | -0.41 | 0.79 | -0.36 |
| O-Fe-porphyrin <sub>TS</sub> | 0.44 | -0.39 | 0.20 | -0.29 |

Table S6. Charge difference of N<sub>2</sub>O or CO between transition state and adsorbed complex.

|                   | Ti-porphyrin | Fe-porphyrin | O-Fe-porphyrin | O-Fe-porphyrin |
|-------------------|--------------|--------------|----------------|----------------|
| Q <sub>diff</sub> | -0.30        | -0.37        | -0.52          | 0.01           |

## 5. Oxidation of CO by N<sub>2</sub>O on O-Ti-porphyrin

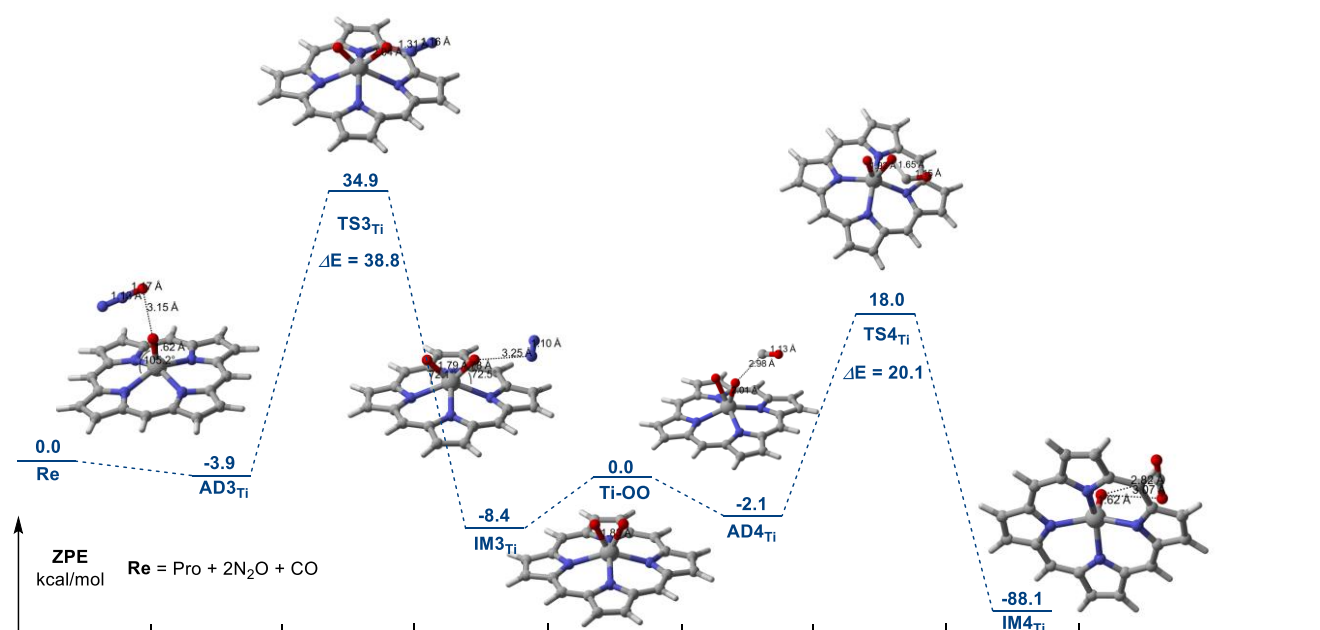

Figure S6. N<sub>2</sub>O decomposition and oxidation of CO on O-Ti-porphyrin

## 6. Oxidation of CO by N<sub>2</sub>O on O-Fe-porphyrin

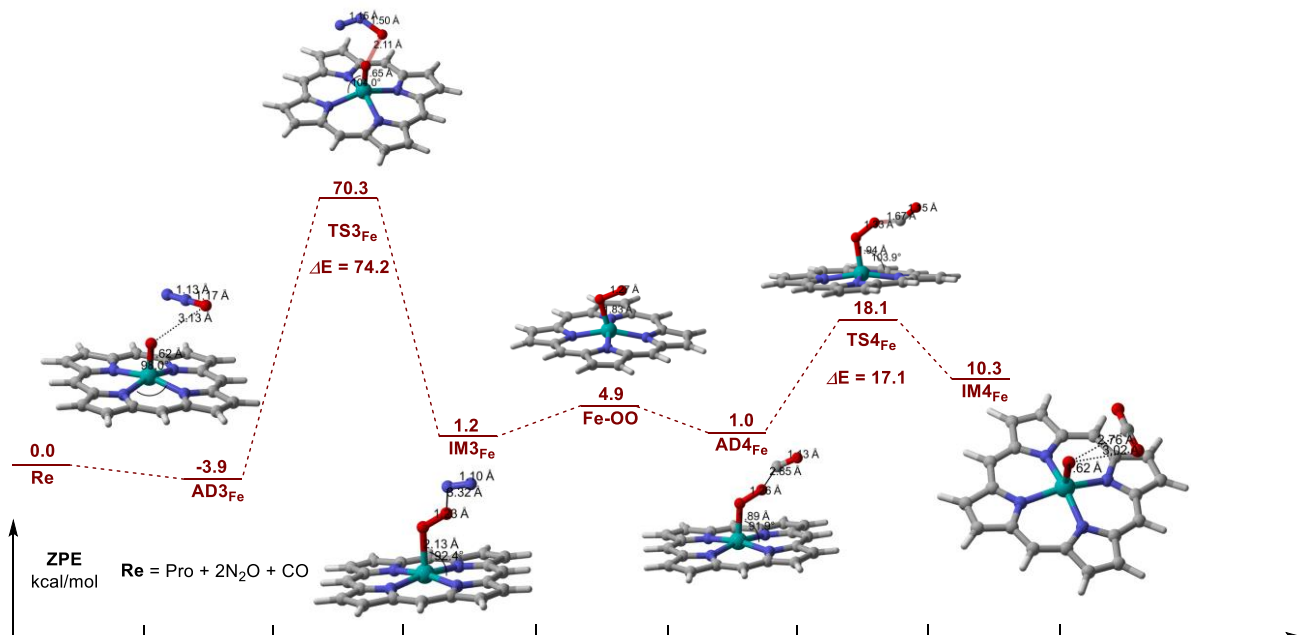

Figure S7. N<sub>2</sub>O decomposition and oxidation of CO on O-Fe-porphyrin



## 7. Cartesian coordinates of all transition states

### TS1<sub>Ti</sub>

O 3

|    |             |             |             |
|----|-------------|-------------|-------------|
| N  | -0.15557400 | 2.04922300  | -0.28838500 |
| N  | -2.19113500 | 0.00001100  | -0.10588200 |
| N  | -0.15562100 | -2.04923000 | -0.28828500 |
| N  | 1.88576900  | -0.00005000 | -0.54715100 |
| Ti | -0.11047600 | 0.00001800  | -0.00215400 |
| O  | 0.42197600  | 0.00010900  | 1.94648300  |
| N  | 1.47633100  | 0.00006100  | 2.62127100  |
| N  | 2.02816900  | -0.00002000 | 3.62384100  |
| C  | -0.84337800 | 4.24231800  | -0.36718900 |
| C  | 0.51281900  | 4.24074500  | -0.49195100 |
| C  | 0.94513300  | 2.87250700  | -0.45362300 |
| C  | -1.26387000 | 2.87532100  | -0.24690000 |
| C  | -4.37747800 | -0.68459400 | -0.01340400 |
| C  | -4.37745800 | 0.68468100  | -0.01339200 |
| C  | -3.01666000 | 1.10793200  | -0.07761700 |
| C  | -3.01669200 | -1.10788200 | -0.07762900 |
| C  | 0.51271500  | -4.24076800 | -0.49193300 |
| C  | -0.84348300 | -4.24231000 | -0.36719100 |
| C  | -1.26394100 | -2.87530400 | -0.24686300 |
| C  | 0.94506100  | -2.87254400 | -0.45355400 |
| C  | 4.05905700  | 0.68495200  | -0.78378200 |
| C  | 4.05904600  | -0.68508400 | -0.78377600 |
| C  | 2.70545000  | -1.10853500 | -0.63089600 |
| C  | 2.70546800  | 1.10842600  | -0.63090900 |

|   |             |             |             |
|---|-------------|-------------|-------------|
| C | -2.57486400 | -2.43317100 | -0.13118900 |
| C | 2.25583500  | -2.43250300 | -0.58275000 |
| C | 2.25589300  | 2.43241100  | -0.58279900 |
| C | -2.57479800 | 2.43321400  | -0.13119000 |
| H | 4.90722300  | -1.35082900 | -0.88012300 |
| H | 4.90724400  | 1.35068300  | -0.88014200 |
| H | 1.17268400  | 5.09014200  | -0.61511600 |
| H | -1.51252600 | 5.09336400  | -0.36803100 |
| H | -5.22991100 | 1.35123900  | 0.01757500  |
| H | -5.22994900 | -1.35113100 | 0.01755300  |
| H | -1.51265200 | -5.09333800 | -0.36808000 |
| H | 1.17256200  | -5.09017500 | -0.61512100 |
| H | 3.01580900  | -3.20215800 | -0.68629200 |
| H | -3.34515300 | 3.19909100  | -0.10849200 |
| H | -3.34523600 | -3.19903100 | -0.10852100 |
| H | 3.01589700  | 3.20203700  | -0.68633000 |

**TS2<sub>Ti</sub>**

0 3

|    |             |             |             |
|----|-------------|-------------|-------------|
| N  | -1.25694300 | -1.41013500 | -0.54527000 |
| N  | 1.59995400  | -1.45447700 | -0.14222400 |
| N  | 1.66367600  | 1.40312500  | -0.14393500 |
| N  | -1.17783800 | 1.49163800  | -0.51082200 |
| Ti | 0.09596600  | -0.00767500 | 0.19939700  |
| O  | -0.49990800 | -0.09016000 | 1.82396900  |
| C  | -2.17187800 | -0.24701200 | 2.39464800  |
| O  | -2.37074800 | 0.16956800  | 3.44610900  |
| C  | -2.35097500 | -3.41474500 | -0.77425500 |

|   |             |             |             |
|---|-------------|-------------|-------------|
| C | -3.29871400 | -2.42261400 | -0.76925600 |
| C | -2.60091400 | -1.18786000 | -0.62339700 |
| C | -1.08665900 | -2.78368500 | -0.61465600 |
| C | 3.60585900  | -2.58405800 | -0.02001900 |
| C | 2.62435200  | -3.51742400 | -0.16787500 |
| C | 1.38103800  | -2.81259600 | -0.25236400 |
| C | 2.96481600  | -1.30038100 | -0.01020200 |
| C | 2.77368100  | 3.41586700  | -0.11537400 |
| C | 3.71048800  | 2.42549900  | 0.05167700  |
| C | 3.00837800  | 1.18874500  | 0.02439000  |
| C | 1.51201400  | 2.77551900  | -0.23781600 |
| C | -3.17820600 | 2.59934600  | -0.77165600 |
| C | -2.19079300 | 3.53830800  | -0.78972700 |
| C | -0.94944400 | 2.84850100  | -0.60837400 |
| C | -2.54068200 | 1.32302400  | -0.60929400 |
| C | 3.61266100  | -0.08212500 | 0.10499200  |
| C | 0.29847700  | 3.43355000  | -0.46511800 |
| C | -3.19336000 | 0.09541600  | -0.60183800 |
| C | 0.14432700  | -3.41573700 | -0.47303100 |
| H | -2.29004700 | 4.61059700  | -0.90066500 |
| H | -4.24535900 | 2.74665000  | -0.87468900 |
| H | -4.37296800 | -2.52247200 | -0.85140200 |
| H | -2.50404800 | -4.48343500 | -0.85194000 |
| H | 2.72760300  | -4.59313900 | -0.23335900 |
| H | 4.67407200  | -2.73977400 | 0.05749200  |
| H | 4.78270400  | 2.52781100  | 0.15619500  |
| H | 2.93294600  | 4.48531900  | -0.16834200 |
| H | 0.34231700  | 4.51760700  | -0.53223200 |

|                         |             |             |             |
|-------------------------|-------------|-------------|-------------|
| H                       | 0.14497800  | -4.50032400 | -0.54627200 |
| H                       | 4.69052300  | -0.10351700 | 0.23628700  |
| H                       | -4.27746700 | 0.12396200  | -0.67139400 |
| <b>TS3<sub>Ti</sub></b> |             |             |             |
| O 3                     |             |             |             |
| N                       | -2.26148500 | -0.05625700 | -0.32907300 |
| N                       | -0.16988600 | -2.01192500 | -0.16433900 |
| N                       | 1.75822000  | 0.07534700  | -0.70797500 |
| N                       | -0.28258400 | 2.02820200  | -0.12726200 |
| Ti                      | -0.21645800 | -0.00127200 | 0.61402900  |
| O                       | -1.18770200 | 0.01836900  | 1.94851500  |
| O                       | 1.31597200  | -0.07613000 | 1.96124500  |
| N                       | 2.59102400  | -0.35835300 | 1.92164200  |
| N                       | 3.59920200  | 0.21266200  | 1.97453100  |
| C                       | -4.44551700 | -0.80314500 | -0.31690600 |
| C                       | -4.48496000 | 0.55619200  | -0.30687300 |
| C                       | -3.11808800 | 1.00635800  | -0.28436500 |
| C                       | -3.05697900 | -1.17442300 | -0.30115400 |
| C                       | 0.57777000  | -4.17323800 | -0.40892200 |
| C                       | -0.78149100 | -4.22654900 | -0.27870200 |
| C                       | -1.23282400 | -2.87574000 | -0.15844000 |
| C                       | 0.94157500  | -2.78883100 | -0.37282200 |
| C                       | 3.89339900  | 0.82482300  | -1.18424300 |
| C                       | 3.92362300  | -0.53428900 | -1.23353300 |
| C                       | 2.59549500  | -0.97901900 | -0.89779300 |
| C                       | 2.54641100  | 1.18612700  | -0.82814500 |
| C                       | -1.03959800 | 4.19936000  | -0.24407800 |
| C                       | 0.32028700  | 4.23569100  | -0.36687100 |

|   |             |             |             |
|---|-------------|-------------|-------------|
| C | 0.77462700  | 2.87950400  | -0.32792700 |
| C | -1.40083500 | 2.81935300  | -0.12843000 |
| C | 2.22050000  | -2.30823300 | -0.67713900 |
| C | 2.08636400  | 2.48325200  | -0.60862200 |
| C | -2.71262300 | 2.33629200  | -0.17458000 |
| C | -2.57363300 | -2.47297700 | -0.19791500 |
| H | 0.95805500  | 5.09816800  | -0.51118700 |
| H | -1.73895800 | 5.02456800  | -0.27313000 |
| H | -5.35246700 | 1.20326200  | -0.30077000 |
| H | -5.27427800 | -1.49929900 | -0.32217500 |
| H | -1.42385300 | -5.09708600 | -0.30647900 |
| H | 1.26900800  | -4.99082400 | -0.56678800 |
| H | 4.76537700  | -1.18013100 | -1.44697600 |
| H | 4.70441800  | 1.52150100  | -1.35202100 |
| H | 2.81184400  | 3.28479700  | -0.72866100 |
| H | -3.31567300 | -3.26812800 | -0.18474200 |
| H | 2.99146100  | -3.06231300 | -0.81795300 |
| H | -3.50147200 | 3.08478900  | -0.16371500 |

#### **TS4<sub>Ti</sub>**

0 3

|    |             |             |             |
|----|-------------|-------------|-------------|
| N  | 1.73069500  | 0.56941900  | -0.61946000 |
| N  | -0.75051200 | 1.94993400  | -0.28142900 |
| N  | -2.13541800 | -0.59613300 | -0.21574700 |
| N  | 0.41522000  | -1.94108000 | -0.37395900 |
| Ti | -0.17553300 | -0.00471700 | 0.21463000  |
| O  | 0.60091800  | 0.50662700  | 2.15345800  |
| O  | -0.61191800 | -0.16440100 | 2.07907400  |
| C  | 1.94268900  | -0.44107300 | 2.32265400  |

|   |             |             |             |
|---|-------------|-------------|-------------|
| O | 2.93962000  | 0.09963000  | 2.52369300  |
| C | 3.61766400  | 1.85769100  | -0.91040500 |
| C | 4.00393000  | 0.55265800  | -0.99340900 |
| C | 2.82781500  | -0.24047400 | -0.80351100 |
| C | 2.20491400  | 1.86105700  | -0.68047400 |
| C | -2.05232300 | 3.84749500  | -0.28865700 |
| C | -0.75662100 | 4.24708300  | -0.42132900 |
| C | 0.04877700  | 3.06181600  | -0.42400900 |
| C | -2.04712000 | 2.41393800  | -0.21838400 |
| C | -4.04039200 | -1.87611200 | -0.18400400 |
| C | -4.43009600 | -0.56588400 | -0.16239200 |
| C | -3.23844000 | 0.22482200  | -0.17645700 |
| C | -2.61158100 | -1.88602600 | -0.21058800 |
| C | 1.65886700  | -3.86046100 | -0.65917200 |
| C | 0.36500800  | -4.24227200 | -0.47379900 |
| C | -0.41225500 | -3.04604400 | -0.32273900 |
| C | 1.68352400  | -2.42850600 | -0.60702400 |
| C | -3.18593000 | 1.61803400  | -0.15834600 |
| C | -1.79898900 | -3.01736900 | -0.23112800 |
| C | 2.80547600  | -1.63442200 | -0.79003800 |
| C | 1.42660100  | 3.01339100  | -0.57455000 |
| H | -0.04276700 | -5.24521000 | -0.46620200 |
| H | 2.52408600  | -4.48664000 | -0.83550100 |
| H | 4.99443500  | 0.15517400  | -1.17382900 |
| H | 4.22791900  | 2.74598100  | -1.01351900 |
| H | -0.37389000 | 5.25481800  | -0.52159800 |
| H | -2.94289000 | 4.46224200  | -0.25785900 |
| H | -5.43652400 | -0.16831700 | -0.13357500 |

|   |             |             |             |
|---|-------------|-------------|-------------|
| H | -4.66620500 | -2.75944600 | -0.17552400 |
| H | -2.30245800 | -3.98033000 | -0.22132200 |
| H | 1.94843300  | 3.96294300  | -0.65531400 |
| H | -4.13885500 | 2.13938000  | -0.12951300 |
| H | 3.75248600  | -2.14269900 | -0.94716000 |

**TS1<sub>Fe</sub>**

0 3

|    |             |             |             |
|----|-------------|-------------|-------------|
| N  | -0.12821200 | 1.99795500  | -0.31812000 |
| N  | -2.11731800 | 0.00084600  | -0.13982600 |
| N  | -0.12991200 | -1.99794200 | -0.31801100 |
| N  | 1.86090700  | -0.00083400 | -0.39622200 |
| Fe | -0.11067400 | -0.00000800 | -0.07102000 |
| O  | -0.04661400 | -0.00002900 | 1.78893800  |
| N  | 1.14221500  | 0.00003000  | 2.66474200  |
| N  | 2.26467300  | -0.00009900 | 2.49738100  |
| C  | -0.80776300 | 4.20084700  | -0.29224200 |
| C  | 0.54965400  | 4.20065400  | -0.38183100 |
| C  | 0.96221800  | 2.82995400  | -0.38897700 |
| C  | -1.21843500 | 2.83035300  | -0.24501600 |
| C  | -4.31770400 | -0.67799900 | -0.01150700 |
| C  | -4.31710800 | 0.68159300  | -0.01138300 |
| C  | -2.94799000 | 1.09394700  | -0.09260000 |
| C  | -2.94894500 | -1.09153900 | -0.09277400 |
| C  | 0.54609300  | -4.20122100 | -0.38143800 |
| C  | -0.81134800 | -4.20025200 | -0.29220200 |
| C  | -1.22086000 | -2.82940900 | -0.24512000 |
| C  | 0.95983000  | -2.83087300 | -0.38857500 |
| C  | 4.06000800  | 0.67798100  | -0.58147600 |

|   |             |             |             |
|---|-------------|-------------|-------------|
| C | 4.05944000  | -0.68155300 | -0.58125800 |
| C | 2.69462900  | -1.09497700 | -0.46537100 |
| C | 2.69554500  | 1.09258900  | -0.46569400 |
| C | -2.53589000 | -2.41141300 | -0.13619300 |
| C | 2.27854900  | -2.41395700 | -0.45318300 |
| C | 2.28057400  | 2.41192200  | -0.45374400 |
| C | -2.53380500 | 2.41346900  | -0.13589800 |
| H | 4.90078400  | -1.35845900 | -0.65410600 |
| H | 4.90191900  | 1.35415800  | -0.65454300 |
| H | 1.22442100  | 5.04527100  | -0.43573600 |
| H | -1.48335200 | 5.04581800  | -0.25709600 |
| H | -5.16015100 | 1.35893000  | 0.03397400  |
| H | -5.16134100 | -1.35460300 | 0.03373600  |
| H | -1.48766700 | -5.04464300 | -0.25719300 |
| H | 1.22015100  | -5.04641600 | -0.43514500 |
| H | 3.04485600  | -3.18128600 | -0.50717700 |
| H | -3.30029400 | 3.18104200  | -0.08699500 |
| H | -3.30304000 | -3.17833600 | -0.08744400 |
| H | 3.04751800  | 3.17859700  | -0.50798300 |

### **TS2<sub>Fe</sub>**

03

|    |             |             |             |
|----|-------------|-------------|-------------|
| N  | 0.14549000  | -1.99130100 | -0.31588900 |
| N  | 2.12899200  | 0.00060400  | -0.15311600 |
| N  | 0.14428700  | 1.99132500  | -0.31599700 |
| N  | -1.83979600 | -0.00065100 | -0.45176200 |
| Fe | 0.12256200  | -0.00005100 | -0.02749000 |
| O  | 0.01167800  | 0.00011400  | 1.65984200  |



|   |             |             |             |
|---|-------------|-------------|-------------|
| C | -1.26104100 | -0.00005000 | 2.86303800  |
| O | -2.35115800 | 0.00021300  | 2.48960100  |
| C | 0.82390900  | -4.19638700 | -0.26924600 |
| C | -0.53177800 | -4.19643900 | -0.37007600 |
| C | -0.94384300 | -2.82570100 | -0.39018100 |
| C | 1.23411500  | -2.82564400 | -0.22767100 |
| C | 4.32853700  | 0.68089900  | 0.00272900  |
| C | 4.32897500  | -0.67834600 | 0.00242300  |
| C | 2.96118100  | -1.09097800 | -0.08891200 |
| C | 2.96048200  | 1.09269700  | -0.08848100 |
| C | -0.53431300 | 4.19603000  | -0.37067100 |
| C | 0.82134500  | 4.19682200  | -0.26941400 |
| C | 1.23237400  | 2.82633000  | -0.22756600 |
| C | -0.94553400 | 2.82502500  | -0.39068500 |
| C | -4.03839500 | -0.68069200 | -0.63941200 |
| C | -4.03879200 | 0.67808800  | -0.63953000 |
| C | -2.67398800 | 1.09094200  | -0.51668300 |
| C | -2.67334800 | -1.09273000 | -0.51651100 |
| C | 2.54674600  | 2.41166300  | -0.11820300 |
| C | -2.26151200 | 2.40939800  | -0.48132000 |
| C | -2.26007900 | -2.41092300 | -0.48081900 |
| C | 2.54826600  | -2.41018000 | -0.11873900 |
| H | -4.87938400 | 1.35550500  | -0.71548000 |
| H | -4.87859200 | -1.35860800 | -0.71528400 |
| H | -1.20701100 | -5.04033600 | -0.42769100 |
| H | 1.50022600  | -5.04028700 | -0.22604300 |
| H | 5.17131600  | -1.35584500 | 0.05606800  |
| H | 5.17044300  | 1.35891300  | 0.05668400  |

|   |             |             |             |
|---|-------------|-------------|-------------|
| H | 1.49713500  | 5.04113900  | -0.22612000 |
| H | -1.21004100 | 5.03950700  | -0.42861900 |
| H | -3.02770400 | 3.17682200  | -0.53468100 |
| H | 3.31400100  | -3.17747600 | -0.05676500 |
| H | 3.31199700  | 3.17942000  | -0.05596200 |
| H | -3.02579500 | -3.17883400 | -0.53398600 |

**TS3<sub>Fe</sub>**

O 3

|    |             |             |             |
|----|-------------|-------------|-------------|
| N  | -0.77522600 | 1.98481700  | -0.31510100 |
| N  | -2.23513800 | -0.47687500 | -0.14019200 |
| N  | 0.19799000  | -1.94731300 | -0.51173900 |
| N  | 1.65722900  | 0.51651400  | -0.69433200 |
| Fe | -0.21329400 | 0.01199200  | 0.07227100  |
| O  | 0.03191600  | -0.01898800 | 1.70434400  |
| O  | 1.71898900  | -1.15320000 | 2.25064500  |
| N  | 2.79555600  | -0.13121600 | 2.48014400  |
| N  | 2.59783300  | 0.98312300  | 2.27566800  |
| C  | -1.96132600 | 3.95126900  | -0.14802100 |
| C  | -0.65298500 | 4.28348600  | -0.32250600 |
| C  | 0.07859000  | 3.05243400  | -0.42145600 |
| C  | -2.02733700 | 2.51750300  | -0.13896900 |
| C  | -4.18678100 | -1.67504600 | 0.09576700  |
| C  | -4.51602700 | -0.35524500 | 0.14875500  |
| C  | -3.29322100 | 0.38299100  | 0.00770600  |
| C  | -2.76373300 | -1.74101400 | -0.07924200 |
| C  | 1.38492300  | -3.91169000 | -0.68290800 |
| C  | 0.07966000  | -4.24665900 | -0.49310700 |
| C  | -0.65125800 | -3.01617700 | -0.38042500 |

|   |             |             |             |
|---|-------------|-------------|-------------|
| C | 1.44934400  | -2.47767900 | -0.68524500 |
| C | 3.60445200  | 1.71429100  | -0.97045200 |
| C | 3.93101500  | 0.39464900  | -1.03248700 |
| C | 2.71284500  | -0.34352100 | -0.85260900 |
| C | 2.18787400  | 1.78095200  | -0.75089700 |
| C | -2.02394400 | -2.91455200 | -0.18402300 |
| C | 2.61100400  | -1.73041700 | -0.84564900 |
| C | 1.45177900  | 2.95227800  | -0.62065900 |
| C | -3.19046800 | 1.77031700  | 0.01075600  |
| H | 4.90621500  | -0.04949200 | -1.18506600 |
| H | 4.25747800  | 2.57281600  | -1.05905200 |
| H | -0.21341700 | 5.27069000  | -0.38483300 |
| H | -2.81274200 | 4.61065400  | -0.03827500 |
| H | -5.49619500 | 0.08795400  | 0.26963700  |
| H | -4.84229100 | -2.53377700 | 0.16395600  |
| H | -0.35867600 | -5.23460700 | -0.43411800 |
| H | 2.23529100  | -4.56913700 | -0.81031300 |
| H | 3.53512700  | -2.28740400 | -0.97534800 |
| H | -4.11480800 | 2.32739700  | 0.13923700  |
| H | -2.57638600 | -3.84738800 | -0.10768100 |
| H | 2.00465800  | 3.88562700  | -0.68419300 |

**TS4<sub>Fe</sub>**

03

|    |             |             |             |
|----|-------------|-------------|-------------|
| N  | 1.73069500  | 0.56941900  | -0.61946000 |
| N  | -0.75051200 | 1.94993400  | -0.28142900 |
| N  | -2.13541800 | -0.59613300 | -0.21574700 |
| N  | 0.41522000  | -1.94108000 | -0.37395900 |
| Ti | -0.17553300 | -0.00471700 | 0.21463000  |

|   |             |             |             |
|---|-------------|-------------|-------------|
| O | 0.60091800  | 0.50662700  | 2.15345800  |
| O | -0.61191800 | -0.16440100 | 2.07907400  |
| C | 1.94268900  | -0.44107300 | 2.32265400  |
| O | 2.93962000  | 0.09963000  | 2.52369300  |
| C | 3.61766400  | 1.85769100  | -0.91040500 |
| C | 4.00393000  | 0.55265800  | -0.99340900 |
| C | 2.82781500  | -0.24047400 | -0.80351100 |
| C | 2.20491400  | 1.86105700  | -0.68047400 |
| C | -2.05232300 | 3.84749500  | -0.28865700 |
| C | -0.75662100 | 4.24708300  | -0.42132900 |
| C | 0.04877700  | 3.06181600  | -0.42400900 |
| C | -2.04712000 | 2.41393800  | -0.21838400 |
| C | -4.04039200 | -1.87611200 | -0.18400400 |
| C | -4.43009600 | -0.56588400 | -0.16239200 |
| C | -3.23844000 | 0.22482200  | -0.17645700 |
| C | -2.61158100 | -1.88602600 | -0.21058800 |
| C | 1.65886700  | -3.86046100 | -0.65917200 |
| C | 0.36500800  | -4.24227200 | -0.47379900 |
| C | -0.41225500 | -3.04604400 | -0.32273900 |
| C | 1.68352400  | -2.42850600 | -0.60702400 |
| C | -3.18593000 | 1.61803400  | -0.15834600 |
| C | -1.79898900 | -3.01736900 | -0.23112800 |
| C | 2.80547600  | -1.63442200 | -0.79003800 |
| C | 1.42660100  | 3.01339100  | -0.57455000 |
| H | -0.04276700 | -5.24521000 | -0.46620200 |
| H | 2.52408600  | -4.48664000 | -0.83550100 |
| H | 4.99443500  | 0.15517400  | -1.17382900 |
| H | 4.22791900  | 2.74598100  | -1.01351900 |

|   |             |             |             |
|---|-------------|-------------|-------------|
| H | -0.37389000 | 5.25481800  | -0.52159800 |
| H | -2.94289000 | 4.46224200  | -0.25785900 |
| H | -5.43652400 | -0.16831700 | -0.13357500 |
| H | -4.66620500 | -2.75944600 | -0.17552400 |
| H | -2.30245800 | -3.98033000 | -0.22132200 |
| H | 1.94843300  | 3.96294300  | -0.65531400 |
| H | -4.13885500 | 2.13938000  | -0.12951300 |
| H | 3.75248600  | -2.14269900 | -0.94716000 |

**TS<sub>Co</sub>**

0 2

|    |             |             |             |
|----|-------------|-------------|-------------|
| N  | 0.11214800  | -1.98952400 | -0.27327500 |
| N  | 2.09761200  | -0.00001200 | -0.20344300 |
| N  | 0.11217000  | 1.98952300  | -0.27329400 |
| N  | -1.85814800 | 0.00000900  | -0.41178400 |
| Co | 0.10558400  | 0.00000200  | -0.14397900 |
| O  | 0.20279900  | 0.00001300  | 1.69035000  |
| N  | -1.07866600 | 0.00000800  | 2.62140300  |
| N  | -2.18460800 | -0.00000100 | 2.41597900  |
| C  | 0.78952800  | -4.19616100 | -0.19033500 |
| C  | -0.56563300 | -4.19776100 | -0.27224800 |
| C  | -0.97541900 | -2.82501900 | -0.31831900 |
| C  | 1.19961700  | -2.82274000 | -0.18747400 |
| C  | 4.29968300  | 0.67911200  | -0.07604500 |
| C  | 4.29967900  | -0.67915000 | -0.07605100 |
| C  | 2.92951500  | -1.09075500 | -0.14057200 |
| C  | 2.92952300  | 1.09072400  | -0.14056400 |
| C  | -0.56559900 | 4.19776300  | -0.27224800 |
| C  | 0.78956100  | 4.19615600  | -0.19032100 |

|   |             |             |             |
|---|-------------|-------------|-------------|
| C | 1.19964500  | 2.82273000  | -0.18746900 |
| C | -0.97539100 | 2.82502500  | -0.31833600 |
| C | -4.06086000 | -0.67926000 | -0.58868500 |
| C | -4.06085500 | 0.67929000  | -0.58869400 |
| C | -2.69691500 | 1.09253000  | -0.47006600 |
| C | -2.69692300 | -1.09250400 | -0.47005100 |
| C | 2.51627600  | 2.40906700  | -0.12785300 |
| C | -2.29027200 | 2.41110600  | -0.41551400 |
| C | -2.29029700 | -2.41108400 | -0.41549000 |
| C | 2.51625100  | -2.40909400 | -0.12787000 |
| H | -4.90098300 | 1.35794900  | -0.65866200 |
| H | -4.90099000 | -1.35791600 | -0.65864100 |
| H | -1.24379500 | -5.04066300 | -0.30441800 |
| H | 1.46826900  | -5.03776500 | -0.14039800 |
| H | 5.14103700  | -1.35860300 | -0.03307600 |
| H | 5.14104400  | 1.35856300  | -0.03306500 |
| H | 1.46830400  | 5.03775700  | -0.14036300 |
| H | -1.24375900 | 5.04066700  | -0.30441400 |
| H | -3.05912800 | 3.17663800  | -0.45541200 |
| H | 3.28285500  | -3.17566300 | -0.06772800 |
| H | 3.28288700  | 3.17562600  | -0.06769600 |
| H | -3.05916300 | -3.17660600 | -0.45538700 |

**TS<sub>Ni</sub>**

0 1

|   |             |             |             |
|---|-------------|-------------|-------------|
| N | -0.03144600 | 1.97115500  | -0.38252300 |
| N | -1.84438800 | -0.15408900 | -0.52457000 |
| N | 0.27904300  | -1.95966400 | -0.37378700 |

|    |             |             |             |
|----|-------------|-------------|-------------|
| N  | 2.07548400  | 0.16314200  | -0.19232300 |
| Ni | 0.12405800  | 0.00356300  | -0.24936600 |
| O  | 0.02259600  | -0.01738700 | 1.62187400  |
| N  | -1.03238600 | -0.04341600 | 3.16512000  |
| N  | -2.11405500 | -0.07067800 | 3.39807000  |
| C  | -0.88256000 | 4.11322700  | -0.47873300 |
| C  | 0.44305000  | 4.22189500  | -0.20739100 |
| C  | 0.96086800  | 2.88888200  | -0.14858000 |
| C  | -1.17328600 | 2.71344900  | -0.55843700 |
| C  | -3.99274600 | -0.99628600 | -0.53306800 |
| C  | -4.08999400 | 0.34729700  | -0.70048000 |
| C  | -2.75388600 | 0.86219700  | -0.67022000 |
| C  | -2.59657100 | -1.29700300 | -0.42852000 |
| C  | 1.12559000  | -4.10521400 | -0.34310100 |
| C  | -0.22671200 | -4.20836600 | -0.28765700 |
| C  | -0.74359000 | -2.87355900 | -0.30603200 |
| C  | 1.42982500  | -2.70669300 | -0.36655400 |
| C  | 4.19644800  | 1.00584700  | 0.13794400  |
| C  | 4.32004300  | -0.33654400 | -0.02006100 |
| C  | 2.99813700  | -0.85389600 | -0.20094200 |
| C  | 2.80222100  | 1.30804900  | 0.02618700  |
| C  | -2.08947300 | -2.57341100 | -0.30370400 |
| C  | 2.71001000  | -2.19667200 | -0.32023000 |
| C  | 2.28842800  | 2.58622200  | 0.06823700  |
| C  | -2.44477200 | 2.20544500  | -0.72451800 |
| H  | 5.21456600  | -0.94530200 | -0.00475300 |
| H  | 4.96803900  | 1.74649100  | 0.30254900  |
| H  | 1.03866500  | 5.11419000  | -0.06546400 |

|   |             |             |             |
|---|-------------|-------------|-------------|
| H | -1.61998000 | 4.89600900  | -0.59954200 |
| H | -4.97642000 | 0.95694700  | -0.81746400 |
| H | -4.78125200 | -1.73629700 | -0.49173500 |
| H | -0.84101100 | -5.09842100 | -0.24797900 |
| H | 1.86961700  | -4.89099000 | -0.34891800 |
| H | 3.53851000  | -2.89739300 | -0.31582100 |
| H | -3.26075500 | 2.91070100  | -0.84527000 |
| H | -2.79309500 | -3.39702800 | -0.23847300 |
| H | 2.97678700  | 3.40609400  | 0.24536000  |

### TS<sub>Cu</sub>

0 2

|    |             |             |             |
|----|-------------|-------------|-------------|
| N  | 1.92090600  | -0.00596500 | -0.39884500 |
| N  | -0.08881100 | 2.02640900  | -0.35826400 |
| N  | -2.11342100 | 0.00667000  | -0.21569700 |
| N  | -0.10164200 | -2.02630600 | -0.35847600 |
| Cu | -0.09473300 | -0.00051100 | -0.15484300 |
| O  | -0.43355600 | 0.00027000  | 1.82236000  |
| N  | 0.96301400  | -0.00055700 | 2.87119500  |
| N  | 2.05545200  | -0.00202000 | 2.66512100  |
| C  | 4.11913500  | 0.66710700  | -0.50471900 |
| C  | 4.11484700  | -0.69323000 | -0.50288400 |
| C  | 2.74128400  | -1.10346500 | -0.43958400 |
| C  | 2.74819900  | 1.08617600  | -0.44225100 |
| C  | -0.75946100 | 4.22522000  | -0.28612600 |
| C  | 0.59820100  | 4.22168200  | -0.36396900 |
| C  | 1.00616800  | 2.84439900  | -0.39459900 |
| C  | -1.17614400 | 2.85037000  | -0.27040500 |



|   |             |             |             |
|---|-------------|-------------|-------------|
| C | -4.30094200 | -0.66674700 | -0.01798300 |
| C | -4.29657500 | 0.69367500  | -0.01659700 |
| C | -2.92648800 | 1.10543900  | -0.13084900 |
| C | -2.93350100 | -1.08707500 | -0.13289100 |
| C | 0.57166300  | -4.22570000 | -0.36103000 |
| C | -0.78620500 | -4.22070200 | -0.28655400 |
| C | -1.19435400 | -2.84329300 | -0.27237200 |
| C | 0.98836400  | -2.85104200 | -0.39169100 |
| C | -2.49358000 | 2.42327700  | -0.16737400 |
| C | -2.50909200 | -2.40766000 | -0.17082500 |
| C | 2.30881100  | -2.42262200 | -0.43332600 |
| C | 2.32392400  | 2.40798600  | -0.43798200 |
| H | -1.46194100 | -5.06513000 | -0.23962200 |
| H | 1.24257100  | -5.07484300 | -0.38760500 |
| H | 4.95879400  | -1.36974600 | -0.54566100 |
| H | 4.96733400  | 1.33816900  | -0.54925700 |
| H | 1.27440600  | 5.06654500  | -0.39268400 |
| H | -1.42982900 | 5.07385600  | -0.23811200 |
| H | -5.13894900 | 1.36994700  | 0.05284900  |
| H | -5.14765300 | -1.33772000 | 0.05010300  |
| H | -3.27763600 | -3.17264600 | -0.10328500 |
| H | 3.09569500  | 3.17221200  | -0.46745400 |
| H | -3.25703600 | 3.19320500  | -0.09834000 |
| H | 3.07595600  | -3.19158000 | -0.46054100 |

**TS<sub>Zn</sub>**

0 1

|   |            |            |             |
|---|------------|------------|-------------|
| N | 0.12577000 | 2.04212400 | -0.33450900 |
|---|------------|------------|-------------|

|    |             |             |             |
|----|-------------|-------------|-------------|
| N  | -1.95375100 | -0.00757600 | -0.42081600 |
| N  | 0.13945200  | -2.04263200 | -0.33290600 |
| N  | 2.19428900  | 0.00661300  | -0.13135400 |
| Zn | 0.16178900  | 0.00014300  | -0.08376100 |
| O  | -1.26429500 | -0.00393100 | 1.44083400  |
| N  | -0.95427400 | 0.00261500  | 3.06027700  |
| N  | -1.31872700 | 0.01039000  | 4.10597800  |
| C  | -0.55753300 | 4.22935600  | -0.45392300 |
| C  | 0.80090700  | 4.23703900  | -0.36146500 |
| C  | 1.21953500  | 2.86083600  | -0.28727600 |
| C  | -0.96957300 | 2.84884400  | -0.43411600 |
| C  | -4.09926300 | -0.70030000 | -0.78670700 |
| C  | -4.10382300 | 0.67046300  | -0.78748100 |
| C  | -2.76169300 | 1.10366200  | -0.55627900 |
| C  | -2.75426700 | -1.12426100 | -0.55505000 |
| C  | 0.82931700  | -4.23310100 | -0.35597200 |
| C  | -0.52912500 | -4.23472300 | -0.44828300 |
| C  | -0.95042900 | -2.85696700 | -0.43084900 |
| C  | 1.23864800  | -2.85398700 | -0.28422700 |
| C  | 4.37894600  | 0.69578600  | -0.07425700 |
| C  | 4.38353700  | -0.66774400 | -0.07362600 |
| C  | 3.00846100  | -1.08933500 | -0.11882300 |
| C  | 3.00106500  | 1.10806200  | -0.11983100 |
| C  | -2.28046900 | -2.43105100 | -0.52895900 |
| C  | 2.55857000  | -2.41096100 | -0.17767800 |
| C  | 2.54237400  | 2.42663400  | -0.18012400 |
| C  | -2.29667600 | 2.41368800  | -0.53173800 |
| H  | 5.23873400  | -1.33174800 | -0.05656000 |

|   |             |             |             |
|---|-------------|-------------|-------------|
| H | 5.22964600  | 1.36555900  | -0.05775800 |
| H | 1.46553600  | 5.09184600  | -0.34749900 |
| H | -1.22708800 | 5.07703200  | -0.53061400 |
| H | -4.94697400 | 1.32680500  | -0.96425000 |
| H | -4.93801200 | -1.36245900 | -0.96273000 |
| H | -1.19298900 | -5.08700400 | -0.52338800 |
| H | 1.49971800  | -5.08336700 | -0.34056100 |
| H | 3.32442000  | -3.18250600 | -0.15548300 |
| H | -3.04866300 | 3.19234200  | -0.63337200 |
| H | -3.02715000 | -3.21494700 | -0.62942000 |
| H | 3.30311800  | 3.20324200  | -0.15891000 |
